# Supplementary material
Source: Elsevier journal article supplement (https://comptes-rendus.academie-sciences.fr/biologies/article/10.1016/j.crvi.2010.12.001/file/attach/mmc2.pdf)
Supplement: mmc2 [file mmc2.pdf]

## Appendix II

| <b>Acridian species</b>                               | <b>Code</b> | <b>A1</b> | <b>A2</b> | <b>C2</b> | <b>A3</b> | <b>C1</b> | <b>Ca</b> |
|-------------------------------------------------------|-------------|-----------|-----------|-----------|-----------|-----------|-----------|
| <i>Acinipe algeriensis</i> Descamps & Mounassif, 1972 | Acalg       | 0         | 0         | 0         | 0         | 0         | 1         |
| <i>Acrida turrita</i> (L., 1758)                      | Actur       | 0         | 0         | 0         | 0         | 0         | 0         |
| <i>Acrotylus longipes</i> (Charpentier, 1845)         | Aclon       | 0         | 0         | 0         | 0.01      | 2.17      | 1.69      |
| <i>Acrotylus patruelis</i> (Herrich-Schaeffer, 1838)  | Acpat       | 0.143     | 0.49      | 3.66      | 0         | 0         | 0.52      |
| <i>Aiolopus simulatrix</i> (Walker, 1870)             | Aiosim      | 0.039     | 0.03      | 0.01      | 3.58      | 3.7       | 0         |
| <i>Aiolopus thalassinus</i> (Fabricius, 1781)         | Aioth       | 0         | 0         | 0         | 0         | 0.07      | 0         |
| <i>Anacridium aegyptium</i> (L., 1764)                | Anaeg       | 0         | 0         | 0         | 0.29      | 18.6      | 0         |
| <i>Calliptamus barbarus</i> (Costa, 1836)             | Cabar       | 2.109     | 0.03      | 5.66      | 0         | 0.7       | 0.31      |
| <i>Dericorys millierei</i> Bonnet & Finot, 1884       | Demil       | 6.445     | 1.29      | 1.52      | 0         | 0         | 0.02      |
| <i>Doclostaurus nov sp</i>                            | Donov       | 0         | 0         | 0         | 0.01      | 0.01      | 0.39      |
| <i>Duroniella lucasi</i> (Bolivar, 1881)              | Dluc        | 0         | 0.04      | 0.1       | 0.01      | 0         | 0         |
| <i>Egnatioides striatus</i> Vosseler, 1902            | Egnstr      | 0         | 0         | 0         | 8.65      | 13.5      | 0.11      |
| <i>Eremogryllus hammadae</i> Krauss, 1902             | Erham       | 0         | 0         | 0         | 0         | 0         | 0         |
| <i>Eyprepocnemis plorans</i> (Charpentier, 1825)      | Eypl        | 0         | 0         | 0         | 0         | 0         | 0         |
| <i>Heteracris adpersa</i> (Redtenbacher, 1889)        | Heads       | 6.12      | 2.85      | 1.04      | 0         | 5.42      | 0         |
| <i>Heteracris annulosa</i> Walker, 1870               | Heann       | 3.464     | 0.27      | 2.66      | 0         | 0.07      | 0.85      |
| <i>Heteracris harterti</i> (Bolivar, 1913)            | Hehar       | 1.354     | 0.09      | 3.98      | 1.2       | 0.33      | 0.39      |
| <i>Hilethera aeolopoides</i> Uvarov, 1923             | Hilaeol     | 1.484     | 0.86      | 3.42      | 0.04      | 0.08      | 0.22      |
| <i>Hyalorrhypis calcarata</i> (Vosseler, 1902)        | Hyaca       | 0         | 0         | 0         | 0.74      | 0         | 0.07      |
| <i>Leptopternis rotschildi</i> Bolivar, 1913          | Leprot      | 0         | 0         | 0         | 0         | 0         | 0.28      |
| <i>Mioscirtus wagneri</i> (Eversman, 1859)            | Miowa       | 0.365     | 19.9      | 1.6       | 0         | 0         | 0         |
| <i>Notopleura near to pygmaea</i> Vosseler, 1902      | Nocfpyg     | 0         | 0         | 0         | 0.72      | 0.1       | 0.02      |
| <i>Notopleura saharica</i> Krauss, 1902               | Nosah       | 1.146     | 0         | 1.47      | 0         | 0         | 1.2       |
| <i>Ochrlidia geniculata</i> (Bolivar, 1913)           | Ocgen       | 0         | 0         | 0         | 0.04      | 0         | 0         |
| <i>Ochrlidia gracilis</i> (Krauss, 1902)              | Ocgra       | 0         | 0         | 0.76      | 0         | 0         | 0         |
| <i>Ochrlidia harterti</i> (Bolivar, 1913)             | Ochar       | 0         | 0         | 0         | 17.2      | 24.4      | 0.02      |
| <i>Pamphagulus bodenheimeri dumonti</i> Uvarov, 1929  | Padum       | 0.482     | 0         | 0.12      | 0         | 0         | 0         |
| <i>Pamphagulus cf uvarovi</i> Ramme, 1931             | Pacfuva     | 0         | 0         | 0         | 0         | 0         | 0.44      |
| <i>Pyrgomorpha cognata</i> Krauss, 1877               | Pycog       | 0         | 0         | 0         | 0         | 0         | 0.94      |
| <i>Pyrgomorpha conica</i> (Ollivier, 1791)            | Pyrcon      | 5.143     | 10.9      | 4.34      | 0         | 0         | 0         |
| <i>Sphingoderus carinatus</i> (Saussure, 1888)        | Spcar       | 0         | 0.03      | 0.07      | 10.6      | 7.14      | 0         |
| <i>Sphingonotus lucasi</i> (Saussure, 1888)           | Spluc       | 0.482     | 0.05      | 1.03      | 0         | 0         | 0         |
| <i>Sphingonotus rubescens</i> (Walker, 1870)          | Sprub       | 0.052     | 0         | 5         | 0.34      | 0         | 0.94      |
| <i>Sphingonotus savignyi</i> (Saussure, 1884)         | Ssav        | 0.013     | 0         | 0.09      | 0         | 0         | 1.87      |
| <i>Sphingonotus tricinctus</i> (Walker, 1870)         | Sptri       | 0         | 0         | 0         | 0         | 0         | 0.3       |
| <i>Sphingonotus vosseleri</i> Krauss, 1902            | Sphvos      | 0         | 0         | 0         | 0         | 0         | 0.59      |
| <i>Tmethis pulchripennis</i> (Serville, 1836)         | Tmpul       | 0         | 0         | 0.17      | 0         | 0         | 0.41      |
| <i>Tropidopola cylindrica</i> (Marschall, 1835)       | Trcyl       | 0         | 0         | 0         | 0         | 0         | 0         |
| <i>Truxalis nasuta</i> (L., 1758)                     | Trnas       | 0         | 0         | 0.38      | 0         | 1.74      | 0.2       |
| <i>Tuarega insignis</i> (Lucas, 1851)                 | Tuins       | 0         | 0         | 0         | 0.33      | 0.27      | 0.83      |
